# Supplementary material for: Carotenoids exclusively synthesized in red pepper (capsanthin and capsorubin) protect human dermal fibroblasts against UVB induced DNA damage
Source: Royal Society of Chemistry journal article supplement (doi:10.1039/c6pp00134c), 2016-08-18
Supplement: c6pp00134c1.pdf [file c6pp00134c1.pdf]

1 **Figure 1 suppl.-** UV-Vis absorption spectra of capsanthin (a) and capsorubin (b). THF  
2 was used as solvent in both cases.

3 **Figure 2 suppl.-** Lutein (1) absorption by hdf after irradiation with UVB doses (a, 0  
4 mJ/cm<sup>2</sup>; b, 100 mJ/cm<sup>2</sup>; c, 300 mJ/cm<sup>2</sup>). I.S., internal standard for quantification.

5
