# Supplementary material for: Carotenoids exclusively synthesized in red pepper (capsanthin and capsorubin) protect human dermal fibroblasts against UVB induced DNA damage
Source: Royal Society of Chemistry journal article supplement (doi:10.1039/c6pp00134c), 2016-08-18
Supplement: c6pp00134c2.pdf [file c6pp00134c2.pdf]

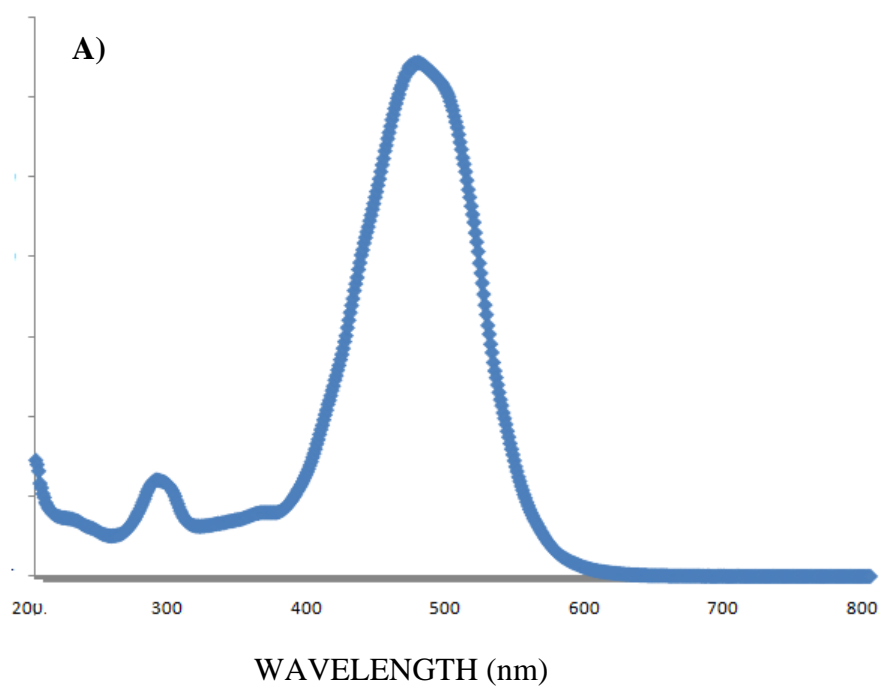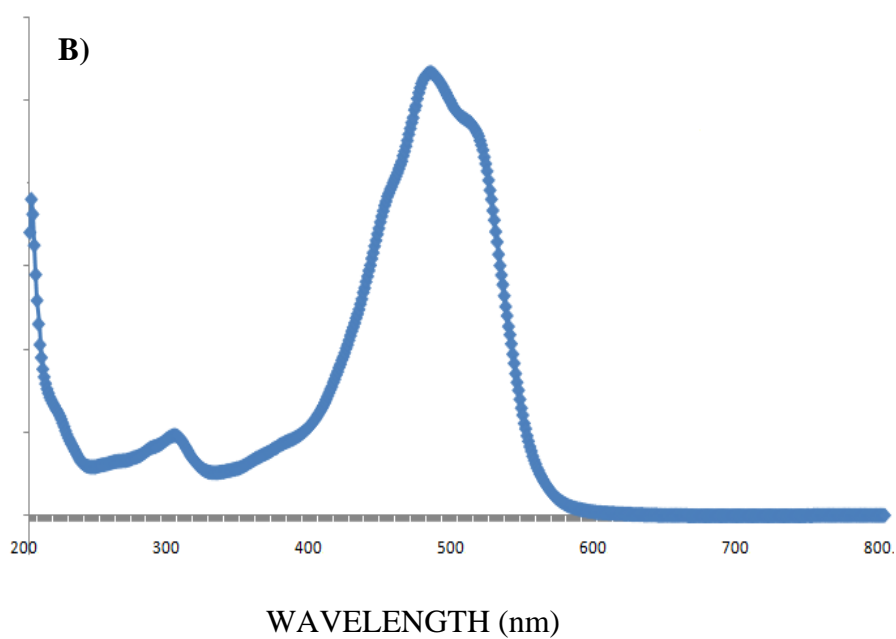

**Figure 1 suppl.-** UV-Vis absorption spectra of capsanthin (a) and capsorubin (b). THF was used as solvent in both cases.
